# Supplementary material
Source: MDPI journal article supplement (https://www.mdpi.com/2311-7524/7/10/368)
Supplement: s1 [file s1]

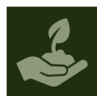

## Article

# “Oh, You Shouldn’t Have!” Understanding Key Factors Impacting Cut Flowers Gifting Preferences in Germany

Meike Rombach <sup>1,\*</sup>, David L. Dean<sup>2</sup>, Nicole J. Olynk Widmar<sup>3</sup> and Vera Bitsch <sup>4</sup>

Table S1. Most popular flowers in Germany.

| Common Name      | Family     | Description                                                                                                                                          |
|------------------|------------|------------------------------------------------------------------------------------------------------------------------------------------------------|
| Rose             | Rosaceae   | On the German market, they are the most popular plant being available in shades of red, pink, orange and cream. The plant is available all year.     |
| Tulip            | Liliaceae  | On the German market, it is popular spring plant, coming as simple or filled types in red, pink, violette, white, yellow and orange.                 |
| Common Sunflower | Asteraceae | On the German market, the sunflower is popular in summer and fall. Red, orange and yellow are common shades of colour available in the German market |
| Chrysanthemum    | Asteraceae | On the German market, the plant is available all year. They are commonly available in shades of white, pink, yellow, orange and red.                 |
| Gerbera          | Asteracea  | The flower is available all year. On the German market, they are commonly available in various colours such as yellow, orange, red, pink or white.   |

Source: Authors own elaboration.

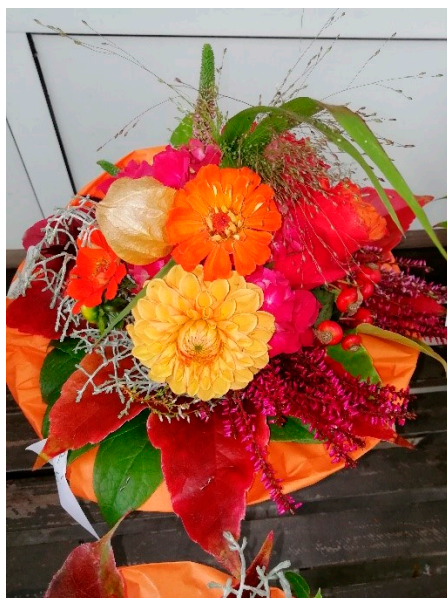

Figure S1. Example of a flower bouquet sold in physical retail in Germany.

Source: Authors.

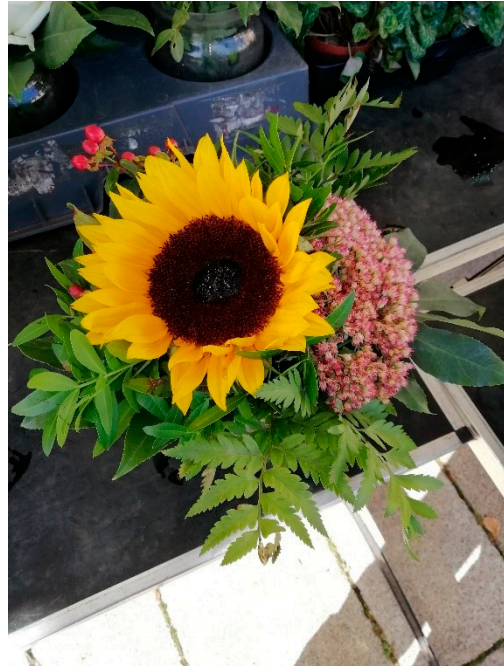

**Figure S2.** Example of a flower bouquet sold in a discounter in Germany.  
Source: Authors.
